# Supplementary material for: Psychosocial consequences of false positives in the Danish Lung Cancer CT Screening Trial: a nested matched cohort study
Source: PubMed Central journal article supplement — BMJ Open. 2020 Jun 4;10(6):e034682. doi: 10.1136/bmjopen-2019-034682 (PMC7279658; doi:10.1136/bmjopen-2019-034682), 2020-06-04
Supplement: bmjopen-2019-034682supp001.pdf [file bmjopen-2019-034682supp001.pdf]

## Appendix 1

**False-positive rates in the National Lung Screening Trial (NLST) and  
the Danish Lung Cancer Screening Trial (DLCST)**

| Trial        | Study threshold of an abnormal non-calcified lung nodule (screening test positive)* | Round of screening | Number screened | Abnormal lung nodules over study threshold (screening test positive) | Lung cancer nodules (true positives) | Nodules not lung cancer (false positives) | False-positive rate (nodules not lung cancer / no. screened) | Average false-positive rate |
|--------------|-------------------------------------------------------------------------------------|--------------------|-----------------|----------------------------------------------------------------------|--------------------------------------|-------------------------------------------|--------------------------------------------------------------|-----------------------------|
| NLST         | ≥4 mm                                                                               | Baseline           | 26 309          | 7191                                                                 | 270                                  | 6921                                      | 0.2631                                                       |                             |
|              |                                                                                     | Year 1             | 24 715          | 6901                                                                 | 168                                  | 6733                                      | 0.2724                                                       |                             |
|              |                                                                                     | Year 2             | 24 102          | 4054                                                                 | 211                                  | 3843                                      | 0.1594                                                       |                             |
| <i>Total</i> |                                                                                     |                    | <i>75 126</i>   |                                                                      |                                      | <i>17 497</i>                             |                                                              | <i>0.2329</i>               |
| DLCST        | ≥5 mm                                                                               | Baseline           | 2047            | 179                                                                  | 17                                   | 162                                       | 0.0791                                                       |                             |
|              |                                                                                     | Year 1             | 1976            | 45                                                                   | 11                                   | 34                                        | 0.0172                                                       |                             |
|              |                                                                                     | Year 2             | 1944            | 52                                                                   | 13                                   | 39                                        | 0.0201                                                       |                             |
|              |                                                                                     | Year 3             | 1982            | 44                                                                   | 12                                   | 32                                        | 0.0161                                                       |                             |
|              |                                                                                     | Year 4             | 1851            | 51                                                                   | 16                                   | 35                                        | 0.0189                                                       |                             |
| <i>Total</i> |                                                                                     |                    | <i>9800</i>     |                                                                      |                                      | <i>302</i>                                |                                                              | <i>0.0308</i>               |

\*In the DLCST, a CT-screening test result was categorised as abnormal (screening test positive) if a non-calcified lung nodule was ≥5 mm which lead to diagnostic evaluation. The test result was categorised as normal (screening test negative) if the nodule was < 5 mm. In the DLCST non-benign nodules between 5-15 mm found on a CT-screening scan lead to a three months follow-up scan. Nodules > 15 mm were referred to diagnostic work-up. In the NLST non-calcified lung nodules of at least 4 mm found on a CT-screening scan were classified as abnormal screening results (screening test positive) and nodules < 4 mm were classified as normal screening results (screening test negative).
