# Supplementary material for: Psychosocial consequences of false positives in the Danish Lung Cancer CT Screening Trial: a nested matched cohort study
Source: PubMed Central journal article supplement — BMJ Open. 2020 Jun 4;10(6):e034682. doi: 10.1136/bmjopen-2019-034682 (PMC7279658; doi:10.1136/bmjopen-2019-034682), 2020-06-04
Supplement: bmjopen-2019-034682supp002.pdf [file bmjopen-2019-034682supp002.pdf]

## Appendix 2

**List of items included in the 15 scales of the questionnaire  
Consequences of Screening – Lung Cancer (COS-LC)**

|               | Scales                              | Items                                                                                                                                                                                                   |
|---------------|-------------------------------------|---------------------------------------------------------------------------------------------------------------------------------------------------------------------------------------------------------|
| <b>Part I</b> | <b>1. Anxiety</b>                   | Worried about my future<br>Nervous<br>Scared<br>Restless<br>Shocked<br>Upset<br>Terrified                                                                                                               |
|               | <b>2. Behaviour</b>                 | Difficulty doing things around the house<br>Difficulty dealing with work or other commitments<br>Quieter than normal<br>Hard to concentrate<br>Withdrawn into myself<br>Change in appetite<br>Irritable |
|               | <b>3. Dejection</b>                 | Worried<br>Uneasy<br>Sad<br>Depressed<br>Time passed slowly<br>Unable to cope                                                                                                                           |
|               | <b>4. Negative impact on sleep</b>  | Woken up far too early in the morning<br>Slept badly<br>Taken long time to fall a sleep<br>Been awake most of the night                                                                                 |
|               | <b>5. Selfblame</b>                 | Felt guilty<br>Blamed oneself<br>Been annoyed with oneself<br>Disappointed in oneself<br>Angry with oneself                                                                                             |
|               | <b>6. Focus on airways symptoms</b> | Aware of being short of breath<br>Been aware of one's coughing                                                                                                                                          |
|               | <b>7. Stigmatisation</b>            | Felt stigmatised                                                                                                                                                                                        |

|                |                                       |                                                                                                                                                                                         |
|----------------|---------------------------------------|-----------------------------------------------------------------------------------------------------------------------------------------------------------------------------------------|
|                |                                       | Being told off by other people<br>A finger wagging from others<br>Blamed by other people                                                                                                |
|                | <b>8. Introvert</b>                   | Insecure<br>Mood Swings<br>Thought one's situation hopeless<br>Sorry for oneself                                                                                                        |
|                | <b>9. Harm of smoking</b>             | Thought of smoking as harmful<br>Sorry for having smoked for many years                                                                                                                 |
| <b>Part II</b> | <b>10. Existential Values</b>         | Broader aspects of life<br>Value of life<br>Enjoyment of life<br>Awareness of life<br>Thought about future<br>Well-being                                                                |
|                | <b>11. Calm/Relax</b>                 | Relaxed<br>Calm                                                                                                                                                                         |
|                | <b>12. Social Network</b>             | Family<br>Friends<br>Other people                                                                                                                                                       |
|                | <b>13. Impulsivity</b>                | Energy<br>Lived life to the full<br>Being impulsive<br>Desire to venture into something risky<br>Desire to venture into something new<br>Done some things that overstepped one's bounds |
|                | <b>14. Empathy</b>                    | Understands other people's problems<br>Responsibility for one's family<br>Ability to listen to other people's problems                                                                  |
|                | <b>15. Regretful of still smoking</b> | Thought about quitting smoking<br>Disappointed in oneself for smoking<br>Annoyed with oneself for smoking<br>Having second thoughts about one's smoking                                 |
