# Supplementary material for: Psychosocial consequences of false positives in the Danish Lung Cancer CT Screening Trial: a nested matched cohort study
Source: PubMed Central journal article supplement — BMJ Open. 2020 Jun 4;10(6):e034682. doi: 10.1136/bmjopen-2019-034682 (PMC7279658; doi:10.1136/bmjopen-2019-034682), 2020-06-04
Supplement: bmjopen-2019-034682supp003.pdf [file bmjopen-2019-034682supp003.pdf]

**Appendix 3**

**Adjusted analyses of the 15 scales in the questionnaire Consequences of Screening – Lung Cancer (COS-LC):  
Mean differences between each pair of the diagnostic groups and the control group during five time points**

|                                          |            | Follow up time         |         |                        |         |                        |         |                        |         |                        |         |
|------------------------------------------|------------|------------------------|---------|------------------------|---------|------------------------|---------|------------------------|---------|------------------------|---------|
|                                          |            | Baseline               |         | 1 week                 |         | 1 Month                |         | 6 Month                |         | 18 Month               |         |
| Scale (Range)                            | Comparison | Mean $\Delta$ (95% CI) | p value |
| 1. Anxiety<br>(0-21)                     | Con-Neg    | -0.46 (-0.99 to 0.07)  | 0.0864  | -0.63 (-1.20 to -0.06) | 0.0317  | -0.66 (-1.40 to 0.07)  | 0.0768  | -0.58 (-1.35 to 0.19)  | 0.1375  | -0.36 (-1.13 to 0.40)  | 0.3519  |
|                                          | Con-FP     | -0.02 (-0.78 to 0.74)  | 0.9582  | 2.77 (1.63 to 3.92)    | <.0001  | -0.25 (-1.25 to 0.75)  | 0.6249  | -1.20 (-2.43 to 0.04)  | 0.0578  | -0.26 (-1.16 to 0.65)  | 0.5821  |
|                                          | Con-TP     | -1.52 (-2.18 to -0.86) | <.0001  | 1.89 (0.01 to 3.78)    | 0.0487  | 2.72 (0.08 to 5.37)    | 0.0438  | -0.54 (-2.30 to 1.21)  | 0.5426  | -0.69 (-2.41 to 1.04)  | 0.4360  |
|                                          | Neg-FP     | 0.44 (-0.27 to 1.16)   | 0.2257  | 3.40 (2.33 to 4.48)    | <.0001  | 0.41 (-0.48 to 1.31)   | 0.3649  | -0.62 (-1.64 to 0.41)  | 0.2390  | 0.11 (-0.75 to 0.97)   | 0.8047  |
|                                          | Neg-TP     | -1.06 (-1.68 to -0.43) | 0.0010  | 2.52 (0.71 to 4.33)    | 0.0063  | 3.38 (0.77 to 6.00)    | 0.0112  | 0.04 (-1.66 to 1.74)   | 0.9666  | -0.32 (-1.98 to 1.34)  | 0.7036  |
|                                          | FP-TP      | -1.50 (-2.29 to -0.71) | 0.0002  | -0.88 (-2.95 to 1.19)  | 0.4043  | 2.97 (0.14 to 5.81)    | 0.0400  | 0.65 (-1.25 to 2.55)   | 0.5012  | -0.43 (-2.20 to 1.34)  | 0.6342  |
| No. Respondents                          |            | 607                    |         | 514                    |         | 444                    |         | 509                    |         | 518                    |         |
| 2. Behaviour<br>(0-21)                   | Con-Neg    | -0.74 (-1.26 to -0.23) | 0.0046  | -0.58 (-1.15 to -0.01) | 0.0469  | -0.74 (-1.41 to -0.08) | 0.0284  | -0.51 (-1.27 to 0.24)  | 0.1838  | -1.00 (-1.80 to -0.20) | 0.0144  |
|                                          | Con-FP     | -0.75 (-1.50 to 0.01)  | 0.0520  | 1.21 (0.19 to 2.23)    | 0.0198  | -0.09 (-1.34 to 1.16)  | 0.8843  | -0.60 (-1.72 to 0.51)  | 0.2873  | -0.07 (-1.30 to 1.17)  | 0.9143  |
|                                          | Con-TP     | -1.05 (-2.16 to 0.06)  | 0.0632  | 0.65 (-0.65 to 1.94)   | 0.3260  | 3.31 (0.50 to 6.11)    | 0.0209  | 0.03 (-1.66 to 1.73)   | 0.9698  | -0.81 (-2.66 to 1.05)  | 0.3948  |
|                                          | Neg-FP     | 0.00 (-0.70 to 0.70)   | 0.9953  | 1.79 (0.84 to 2.74)    | 0.0002  | 0.65 (-0.46 to 1.76)   | 0.2522  | -0.09 (-1.09 to 0.90)  | 0.8551  | 0.93 (-0.21 to 2.07)   | 0.1106  |
|                                          | Neg-TP     | -0.31 (-1.39 to 0.78)  | 0.5793  | 1.23 (-0.02 to 2.47)   | 0.0544  | 4.05 (1.27 to 6.83)    | 0.0043  | 0.54 (-1.13 to 2.22)   | 0.5236  | 0.19 (-1.61 to 2.00)   | 0.8340  |
|                                          | FP-TP      | -0.30 (-1.48 to 0.87)  | 0.6117  | -0.56 (-2.06 to 0.94)  | 0.4636  | 3.40 (0.38 to 6.42)    | 0.0275  | 0.64 (-1.22 to 2.49)   | 0.5005  | -0.74 (-2.80 to 1.32)  | 0.4834  |
| No. Respondents                          |            | 611                    |         | 518                    |         | 438                    |         | 507                    |         | 517                    |         |
| 3. Dejection<br>(0-18)                   | Con-Neg    | -0.41 (-0.92 to 0.10)  | 0.1142  | -0.66 (-1.25 to -0.07) | 0.0291  | -0.55 (-1.24 to 0.13)  | 0.1113  | -0.36 (-1.07 to 0.35)  | 0.3231  | -0.35 (-1.04 to 0.34)  | 0.3216  |
|                                          | Con-FP     | -0.41 (-1.04 to 0.22)  | 0.2017  | 2.63 (1.53 to 3.74)    | <.0001  | -0.09 (-1.21 to 1.04)  | 0.8815  | -1.04 (-2.07 to 0.00)  | 0.0492  | -0.01 (-1.04 to 1.03)  | 0.9903  |
|                                          | Con-TP     | -0.89 (-1.81 to 0.02)  | 0.0562  | 2.20 (0.28 to 4.12)    | 0.0245  | 2.92 (0.57 to 5.27)    | 0.0147  | 0.16 (-1.32 to 1.64)   | 0.8308  | -0.74 (-2.37 to 0.89)  | 0.3726  |
|                                          | Neg-FP     | 0.00 (-0.62 to 0.62)   | 0.9981  | 3.29 (2.27 to 4.31)    | <.0001  | 0.47 (-0.55 to 1.49)   | 0.3695  | -0.68 (-1.59 to 0.23)  | 0.1438  | 0.34 (-0.64 to 1.32)   | 0.4928  |
|                                          | Neg-TP     | -0.48 (-1.39 to 0.43)  | 0.2974  | 2.86 (1.01 to 4.70)    | 0.0024  | 3.48 (1.15 to 5.80)    | 0.0034  | 0.52 (-0.94 to 1.98)   | 0.4857  | -0.39 (-2.04 to 1.25)  | 0.6397  |
|                                          | FP-TP      | -0.48 (-1.44 to 0.47)  | 0.3217  | -0.43 (-2.49 to 1.63)  | 0.6812  | 3.01 (0.44 to 5.58)    | 0.0219  | 1.20 (-0.38 to 2.77)   | 0.1365  | -0.74 (-2.55 to 1.08)  | 0.4270  |
| No. Respondents                          |            | 606                    |         | 521                    |         | 449                    |         | 518                    |         | 526                    |         |
| 4. Negative<br>impact on sleep<br>(0-12) | Con-Neg    | -0.16 (-0.62 to 0.31)  | 0.5047  | -0.16 (-0.65 to 0.33)  | 0.5191  | -0.38 (-0.90 to 0.14)  | 0.1549  | -0.06 (-0.60 to 0.48)  | 0.8321  | -0.29 (-0.82 to 0.24)  | 0.2786  |
|                                          | Con-FP     | -0.26 (-0.89 to 0.37)  | 0.4235  | 0.65 (-0.14 to 1.44)   | 0.1056  | -0.10 (-1.01 to 0.81)  | 0.8308  | -0.32 (-1.20 to 0.56)  | 0.4770  | 0.11 (-0.68 to 0.90)   | 0.7909  |
|                                          | Con-TP     | -0.71 (-1.50 to 0.08)  | 0.0770  | 0.47 (-0.61 to 1.54)   | 0.3928  | 1.94 (0.33 to 3.55)    | 0.0182  | -0.53 (-1.36 to 0.30)  | 0.2116  | -0.90 (-1.96 to 0.15)  | 0.0938  |
|                                          | Neg-FP     | -0.10 (-0.71 to 0.51)  | 0.7458  | 0.81 (0.07 to 1.55)    | 0.0314  | 0.28 (-0.56 to 1.12)   | 0.5130  | -0.26 (-1.07 to 0.54)  | 0.5242  | 0.40 (-0.37 to 1.17)   | 0.3127  |
|                                          | Neg-TP     | -0.55 (-1.32 to 0.21)  | 0.1572  | 0.63 (-0.40 to 1.66)   | 0.2303  | 2.32 (0.71 to 3.93)    | 0.0047  | -0.47 (-1.24 to 0.31)  | 0.2356  | -0.61 (-1.65 to 0.42)  | 0.2452  |
|                                          | FP-TP      | -0.45 (-1.32 to 0.42)  | 0.3057  | -0.18 (-1.38 to 1.02)  | 0.7662  | 2.04 (0.24 to 3.83)    | 0.0260  | -0.21 (-1.25 to 0.84)  | 0.6968  | -1.01 (-2.19 to 0.17)  | 0.0938  |
| No. Respondents                          |            | 612                    |         | 515                    |         | 444                    |         | 515                    |         | 524                    |         |

## Follow up time

| Scale (Range)                        | Comparison | Baseline               |         | 1 week                 |         | 1 Month                |         | 6 Month                |         | 18 Month               |         |
|--------------------------------------|------------|------------------------|---------|------------------------|---------|------------------------|---------|------------------------|---------|------------------------|---------|
|                                      |            | Mean $\Delta$ (95% CI) | p value |
| 5. Selfblame<br>(0-15)               | Con-Neg    | -0.14 (-0.61 to 0.32)  | 0.5511  | -0.52 (-1.25 to 0.20)  | 0.1589  | -0.21 (-0.94 to 0.51)  | 0.5644  | -0.13 (-0.90 to 0.64)  | 0.7424  | 0.26 (-0.63 to 1.16)   | 0.5642  |
|                                      | Con-FP     | 0.54 (-0.19 to 1.27)   | 0.1461  | 1.58 (0.32 to 2.83)    | 0.0136  | 2.16 (0.84 to 3.48)    | 0.0013  | 0.23 (-0.98 to 1.43)   | 0.7132  | 0.74 (-0.34 to 1.83)   | 0.1787  |
|                                      | Con-TP     | -1.15 (-1.91 to -0.39) | 0.0030  | 1.89 (0.09 to 3.70)    | 0.0401  | 1.51 (-0.23 to 3.25)   | 0.0895  | 0.31 (-1.56 to 2.18)   | 0.7476  | 1.45 (-0.74 to 3.64)   | 0.1930  |
|                                      | Neg-FP     | 0.68 (-0.02 to 1.38)   | 0.0557  | 2.10 (0.91 to 3.29)    | 0.0005  | 2.38 (1.05 to 3.70)    | 0.0004  | 0.36 (-0.92 to 1.63)   | 0.5844  | 0.48 (-0.67 to 1.64)   | 0.4145  |
|                                      | Neg-TP     | -1.01 (-1.74 to -0.28) | 0.0069  | 2.41 (0.67 to 4.16)    | 0.0067  | 1.72 (0.00 to 3.45)    | 0.0501  | 0.44 (-1.47 to 2.34)   | 0.6534  | 1.19 (-1.04 to 3.42)   | 0.2957  |
|                                      | FP-TP      | -1.69 (-2.59 to -0.80) | 0.0002  | 0.32 (-1.70 to 2.34)   | 0.7590  | -0.65 (-2.66 to 1.36)  | 0.5249  | 0.08 (-2.07 to 2.23)   | 0.9411  | 0.71 (-1.65 to 3.07)   | 0.5559  |
| No. Respondents                      |            | 606                    |         | 507                    |         | 445                    |         | 517                    |         | 525                    |         |
| 6. Focus on airway symptoms<br>(0-6) | Con-Neg    | -0.07 (-0.19 to 0.05)  | 0.2702  | -0.23 (-0.51 to 0.04)  | 0.0948  | -0.16 (-0.45 to 0.13)  | 0.2807  | 0.00 (-0.30 to 0.30)   | 0.9937  | -0.09 (-0.39 to 0.22)  | 0.5773  |
|                                      | Con-FP     | 0.19 (-0.02 to 0.39)   | 0.0819  | 0.57 (0.13 to 1.02)    | 0.0112  | 0.68 (0.13 to 1.24)    | 0.0160  | 0.23 (-0.16 to 0.63)   | 0.2443  | 0.28 (-0.15 to 0.71)   | 0.1951  |
|                                      | Con-TP     | -0.19 (-0.43 to 0.04)  | 0.1103  | 0.21 (-0.51 to 0.93)   | 0.5650  | 1.60 (0.64 to 2.55)    | 0.0011  | 0.90 (0.21 to 1.58)    | 0.0100  | 0.54 (-0.45 to 1.53)   | 0.2861  |
|                                      | Neg-FP     | 0.25 (0.05 to 0.46)    | 0.0149  | 0.81 (0.39 to 1.22)    | <.0001  | 0.84 (0.29 to 1.39)    | 0.0026  | 0.23 (-0.18 to 0.65)   | 0.2666  | 0.37 (-0.06 to 0.80)   | 0.0912  |
|                                      | Neg-TP     | -0.12 (-0.36 to 0.11)  | 0.2992  | 0.44 (-0.26 to 1.15)   | 0.2139  | 1.76 (0.81 to 2.71)    | 0.0003  | 0.90 (0.22 to 1.58)    | 0.0098  | 0.62 (-0.38 to 1.63)   | 0.2213  |
|                                      | FP-TP      | -0.38 (-0.66 to -0.09) | 0.0094  | -0.36 (-1.14 to 0.42)  | 0.3639  | 0.91 (-0.16 to 1.98)   | 0.0950  | 0.66 (-0.06 to 1.39)   | 0.0733  | 0.25 (-0.79 to 1.30)   | 0.6340  |
| No. Respondents                      |            | 613                    |         | 516                    |         | 447                    |         | 517                    |         | 527                    |         |
| 7. Stigmatization<br>(0-12)          | Con-Neg    | -0.25 (-0.58 to 0.07)  | 0.1281  | -0.22 (-0.71 to 0.28)  | 0.3872  | -0.14 (-0.64 to 0.35)  | 0.5693  | -0.30 (-0.71 to 0.10)  | 0.1395  | 0.45 (-0.05 to 0.95)   | 0.0753  |
|                                      | Con-FP     | 0.12 (-0.39 to 0.63)   | 0.6387  | -0.01 (-0.69 to 0.67)  | 0.9761  | 0.82 (-0.10 to 1.73)   | 0.0803  | 0.46 (-0.49 to 1.41)   | 0.3393  | 0.64 (0.00 to 1.28)    | 0.0492  |
|                                      | Con-TP     | -0.40 (-0.98 to 0.18)  | 0.1715  | -0.37 (-1.25 to 0.51)  | 0.4066  | 0.01 (-0.83 to 0.85)   | 0.9841  | -0.35 (-1.30 to 0.60)  | 0.4697  | 0.63 (-1.06 to 2.31)   | 0.4664  |
|                                      | Neg-FP     | 0.38 (-0.13 to 0.88)   | 0.1444  | 0.21 (-0.44 to 0.85)   | 0.5311  | 0.96 (0.07 to 1.85)    | 0.0340  | 0.76 (-0.17 to 1.70)   | 0.1082  | 0.19 (-0.52 to 0.90)   | 0.5981  |
|                                      | Neg-TP     | -0.15 (-0.73 to 0.43)  | 0.6107  | -0.15 (-0.95 to 0.64)  | 0.7021  | 0.15 (-0.65 to 0.95)   | 0.7098  | -0.05 (-0.97 to 0.88)  | 0.9216  | 0.17 (-1.52 to 1.87)   | 0.8401  |
|                                      | FP-TP      | -0.53 (-1.21 to 0.16)  | 0.1302  | -0.36 (-1.32 to 0.60)  | 0.4614  | -0.81 (-1.93 to 0.31)  | 0.1576  | -0.81 (-2.15 to 0.53)  | 0.2345  | -0.02 (-1.79 to 1.76)  | 0.9857  |
| No. Respondents                      |            | 609                    |         | 505                    |         | 440                    |         | 511                    |         | 522                    |         |
| 8. Introvert<br>(0-12)               | Con-Neg    | -0.37 (-0.68 to -0.06) | 0.0191  | -0.50 (-0.89 to -0.11) | 0.0117  | -0.42 (-0.85 to 0.01)  | 0.0527  | -0.22 (-0.61 to 0.18)  | 0.2888  | -0.38 (-0.84 to 0.09)  | 0.1130  |
|                                      | Con-FP     | 0.22 (-0.29 to 0.73)   | 0.3948  | 0.84 (0.20 to 1.48)    | 0.0102  | 0.02 (-0.72 to 0.76)   | 0.9601  | -0.14 (-0.71 to 0.42)  | 0.6160  | -0.10 (-0.69 to 0.49)  | 0.7378  |
|                                      | Con-TP     | -0.78 (-1.39 to -0.17) | 0.0120  | 0.08 (-0.79 to 0.96)   | 0.8527  | 0.63 (-0.5 to 1.77)    | 0.2754  | 0.11 (-0.81 to 1.02)   | 0.8172  | -0.31 (-1.35 to 0.72)  | 0.5535  |
|                                      | Neg-FP     | 0.59 (0.09 to 1.09)    | 0.0199  | 1.34 (0.74 to 1.94)    | <.0001  | 0.44 (-0.31 to 1.20)   | 0.2496  | 0.07 (-0.49 to 0.63)   | 0.8031  | 0.28 (-0.28 to 0.83)   | 0.3327  |
|                                      | Neg-TP     | -0.41 (-1.01 to 0.19)  | 0.1834  | 0.59 (-0.28 to 1.45)   | 0.1834  | 1.06 (-0.06 to 2.17)   | 0.0634  | 0.32 (-0.60 to 1.24)   | 0.4922  | 0.06 (-0.97 to 1.10)   | 0.9059  |
|                                      | FP-TP      | -1.00 (-1.71 to -0.29) | 0.0058  | -0.76 (-1.75 to 0.23)  | 0.1335  | 0.61 (-0.74 to 1.96)   | 0.3741  | 0.25 (-0.74 to 1.25)   | 0.6192  | -0.21 (-1.32 to 0.89)  | 0.7052  |
| No. Respondents                      |            | 609                    |         | 508                    |         | 444                    |         | 513                    |         | 524                    |         |

## Follow up time

| Scale (Range)                    | Comparison | Baseline               |         | 1 week                 |         | 1 Month                |         | 6 Month                |         | 18 Month               |         |
|----------------------------------|------------|------------------------|---------|------------------------|---------|------------------------|---------|------------------------|---------|------------------------|---------|
|                                  |            | Mean $\Delta$ (95% CI) | p value |
| 9. Harm of smoking<br>(0-6)      | Con-Neg    | -0.11 (-0.35 to 0.12)  | 0.3319  | -0.07 (-0.39 to 0.26)  | 0.6823  | -0.10 (-0.41 to 0.22)  | 0.5513  | 0.03 (-0.29 to 0.35)   | 0.8669  | 0.00 (-0.35 to 0.36)   | 0.9888  |
|                                  | Con-FP     | -0.25 (-0.55 to 0.05)  | 0.1057  | 1.08 (0.61 to 1.56)    | <.0001  | 1.12 (0.56 to 1.67)    | <.0001  | 0.22 (-0.25 to 0.68)   | 0.3560  | 0.32 (-0.15 to 0.79)   | 0.1796  |
|                                  | Con-TP     | -0.50 (-0.92 to -0.09) | 0.0179  | 0.75 (-0.05 to 1.55)   | 0.0651  | 0.99 (0.14 to 1.84)    | 0.0225  | 0.32 (-0.51 to 1.14)   | 0.4546  | 0.80 (-0.26 to 1.85)   | 0.1376  |
|                                  | Neg-FP     | -0.13 (-0.43 to 0.16)  | 0.3730  | 1.15 (0.70 to 1.60)    | <.0001  | 1.21 (0.66 to 1.76)    | <.0001  | 0.19 (-0.27 to 0.65)   | 0.4209  | 0.32 (-0.18 to 0.82)   | 0.2096  |
|                                  | Neg-TP     | -0.39 (-0.81 to 0.03)  | 0.0665  | 0.82 (0.04 to 1.59)    | 0.0382  | 1.08 (0.25 to 1.92)    | 0.0106  | 0.29 (-0.53 to 1.10)   | 0.4892  | 0.79 (-0.27 to 1.86)   | 0.1445  |
|                                  | FP-TP      | -0.26 (-0.70 to 0.19)  | 0.2612  | -0.33 (-1.18 to 0.52)  | 0.4424  | -0.13 (-1.07 to 0.82)  | 0.7922  | 0.10 (-0.80 to 0.99)   | 0.8317  | 0.47 (-0.65 to 1.60)   | 0.4071  |
| No. Respondents                  |            | 615                    |         | 517                    |         | 450                    |         | 519                    |         | 529                    |         |
| 10. Existential values<br>(0-12) | Neg-FP     | NA                     |         | NA                     |         | 0.92 (0.23 to 1.61)    | 0.0090  | 0.40 (-0.54 to 1.35)   | 0.4043  | 0.11 (-0.48 to 0.70)   | 0.7075  |
|                                  | Neg-TP     | NA                     |         | NA                     |         | 2.10 (0.45 to 3.75)    | 0.0125  | 1.57 (0.31 to 2.83)    | 0.0149  | 0.24 (-1.01 to 1.50)   | 0.7031  |
|                                  | FP-TP      | NA                     |         | NA                     |         | 1.18 (-0.55 to 2.92)   | 0.1805  | 1.16 (-0.30 to 2.63)   | 0.1193  | 0.13 (-1.14 to 1.40)   | 0.8385  |
| No. Respondents                  |            |                        |         |                        | 262     |                        | 306     |                        | 307     |                        |         |
| 11. Calm/relax<br>(0-4)          | Neg-FP     | NA                     |         | NA                     |         | 0.46 (0.13 to 0.78)    | 0.0054  | 0.05 (-0.33 to 0.44)   | 0.7852  | -0.03 (-0.26 to 0.21)  | 0.8222  |
|                                  | Neg-TP     | NA                     |         | NA                     |         | 0.82 (0.19 to 1.44)    | 0.0101  | 0.17 (-0.29 to 0.64)   | 0.4722  | -0.01 (-0.42 to 0.40)  | 0.9611  |
|                                  | FP-TP      | NA                     |         | NA                     |         | 0.36 (-0.30 to 1.03)   | 0.2882  | 0.12 (-0.45 to 0.68)   | 0.6866  | 0.02 (-0.44 to 0.47)   | 0.9427  |
| No. Respondents                  |            |                        |         |                        | 265     |                        | 310     |                        | 308     |                        |         |
| 12. Social network<br>(0-6)      | Neg-FP     | NA                     |         | NA                     |         | 0.05 (-0.09 to 0.19)   | 0.4732  | -0.21 (-0.36 to -0.06) | 0.0075  | -0.11 (-0.26 to 0.03)  | 0.1248  |
|                                  | Neg-TP     | NA                     |         | NA                     |         | 0.92 (0.31 to 1.54)    | 0.0032  | 0.45 (0.03 to 0.86)    | 0.0360  | 0.08 (-0.23 to 0.39)   | 0.6139  |
|                                  | FP-TP      | NA                     |         | NA                     |         | 0.87 (0.25 to 1.50)    | 0.0061  | 0.66 (0.24 to 1.07)    | 0.0022  | 0.19 (-0.12 to 0.51)   | 0.2230  |
| No. Respondents                  |            |                        |         |                        | 269     |                        | 312     |                        | 309     |                        |         |
| 13. Impulsivity<br>(0-12)        | Neg-FP     | NA                     |         | NA                     |         | 0.15 (-0.20 to 0.51)   | 0.3963  | 0.19 (-0.24 to 0.62)   | 0.3857  | -0.06 (-0.54 to 0.41)  | 0.7908  |
|                                  | Neg-TP     | NA                     |         | NA                     |         | 1.76 (0.35 to 3.17)    | 0.0146  | 1.27 (-0.04 to 2.58)   | 0.0572  | 0.10 (-0.71 to 0.90)   | 0.8172  |
|                                  | FP-TP      | NA                     |         | NA                     |         | 1.61 (0.20 to 3.02)    | 0.0257  | 1.08 (-0.23 to 2.39)   | 0.1072  | 0.16 (-0.75 to 1.07)   | 0.7311  |
| No. Respondents                  |            |                        |         |                        | 265     |                        | 304     |                        | 307     |                        |         |
| 14. Empathy<br>(0-6)             | Neg-FP     | NA                     |         | NA                     |         | 0.12 (-0.19 to 0.43)   | 0.4394  | 0.02 (-0.32 to 0.35)   | 0.9219  | 0.21 (-0.17 to 0.59)   | 0.2719  |
|                                  | Neg-TP     | NA                     |         | NA                     |         | 0.79 (0.27 to 1.30)    | 0.0027  | 0.71 (0.17 to 1.25)    | 0.0094  | 0.29 (-0.36 to 0.94)   | 0.3819  |
|                                  | FP-TP      | NA                     |         | NA                     |         | 0.66 (0.11 to 1.22)    | 0.0191  | 0.69 (0.12 to 1.27)    | 0.0182  | 0.08 (-0.63 to 0.78)   | 0.8313  |
| No. Respondents                  |            |                        |         |                        | 266     |                        | 306     |                        | 308     |                        |         |

|                                         |        |    |    |                       |        |                      |        |                       |        |
|-----------------------------------------|--------|----|----|-----------------------|--------|----------------------|--------|-----------------------|--------|
| 15. Regretful of still smoking<br>(0-8) | Neg-FP | NA | NA | 0.28 (-0.48 to 1.04)  | 0.4676 | 0.59 (0.00 to 1.18)  | 0.0500 | 0.06 (-0.54 to 0.65)  | 0.8475 |
|                                         | Neg-TP | NA | NA | 0.12 (-1.17 to 1.40)  | 0.8575 | 0.74 (-0.12 to 1.59) | 0.0903 | -0.83 (-1.75 to 0.08) | 0.0742 |
|                                         | FP-TP  | NA | NA | -0.16 (-1.66 to 1.33) | 0.8301 | 0.15 (-0.82 to 1.12) | 0.7673 | -0.89 (-1.85 to 0.07) | 0.0681 |
| No. Respondents                         |        |    |    | 137                   |        | 148                  |        | 150                   |        |

Mean  $\Delta$  = The mean difference of the outcome between the compared groups adjusted for possible confounders; The mean differences of the scales listed in the table are the differences beyond the differences that may be present at baseline (scale 1-9) or at 1 Month (scale 10-15); CI = confidence interval; p value = the statistical significant level was assessed to 0.0043 after adjusting for multiple testing with the method of Benjamini-Hochberg and significant differences between the groups are marked with yellow(1); Con = Control group; Neg = True-negative group; FP = false-positive group; TP = true-positive group; NA = Not applicable.
